# Supplementary material for: NanoDefiner e-Tool: An Implemented Decision Support Framework for Nanomaterial Identification
Source: MDPI journal article supplement (doi:10.3390/ma12193247), 2019-10-04
Supplement: s1 [file s1]

# Supplementary Materials: NanoDefiner e-Tool Knowledge Base Attributes

Raphael Brüngel, Johannes Rückert, Wendel Wohlleben, Frank Babick, Antoine Ghanem, Claire Gaillard, Agnieszka Mech, Hubert Rauscher, Vasile-Dan Hodoroaba, Stefan Weigel and Christoph M. Friedrich

Measurement technique (MT) recommendation for a specific material uses attributes, representing structured and formalized knowledge. For particle type description attributes listed in Table S1 are used to describe its physicochemical properties. Likewise, an MT is described via attributes listed in Table S2 (material-related properties), Table S3 (performance-related properties), and Table S4 (technical and economic properties). For MT recommendation not all MT attributes are matched.

**Table S1.** Matchable attributes for particle type description.

| Attribute Name       | Attribute description                                                                                                                               | Matched |
|----------------------|-----------------------------------------------------------------------------------------------------------------------------------------------------|---------|
| trade_form           | Trade form of particle type                                                                                                                         | Yes     |
| dispersibility       | Dispersibility of particle type by protocols                                                                                                        | Yes     |
| chemical_composition | Chemical compositions of particle type                                                                                                              | Yes     |
| composites           | Composites of particle type                                                                                                                         | Yes     |
| dimensions           | Particle small dimensions number of particle type                                                                                                   | Yes     |
| shape                | Particle shapes of particle type                                                                                                                    | Yes     |
| analysis_temperature | Stable analysis temperature range of particle type (°C)                                                                                             | Yes     |
| electron_beam        | Particle type degradation under electron beam radiation                                                                                             | Yes     |
| polydispersity       | Grade of polydispersity in particle type                                                                                                            | Yes     |
| multimodality        | Grade of multimodality in particle type                                                                                                             | Yes     |
| conductivity         | Conductive properties of particle type                                                                                                              | Yes     |
| magnetism            | Magnetic properties of particle type                                                                                                                | Yes     |
| functionalisation    | Functionalisation of particle type                                                                                                                  | Yes     |
| light_absorption     | Light absorbing properties of particle type                                                                                                         | Yes     |
| fluorescence         | Fluorescent properties of particle type                                                                                                             | Yes     |
| aggregation          | Particle aggregation in particle type                                                                                                               | Yes     |
| agglomeration        | Particle agglomeration in particle type                                                                                                             | Yes     |
| release_iam          | Release of ions, atoms, and molecules of particle type                                                                                              | Yes     |
| wr_size_range        | Particle size range (nm) in particle type                                                                                                           | Yes     |
| presence             | Presence of different sized subnano (diameter < 1 nm in all dimensions) or susnano (diameter > 100 nm in all dimensions) particles in particle type | Yes     |
| os_vacuum            | Degradation of particle type under vacuum                                                                                                           | Yes     |

**Table S2.** Matchable material-related attributes for measurement technique description.

| Attribute Name       | Attribute description                                 | Matched         |
|----------------------|-------------------------------------------------------|-----------------|
| trade_form           | Material trade forms supported by MT                  | Yes             |
| preparation          | Suitable SOP-based preparation techniques for MT      | No <sup>a</sup> |
| dispersion_medium    | Dispersion media supported by MT                      | No <sup>a</sup> |
| dispersibility       | Dispersibilities by protocols supported by MT         | Yes             |
| chemical_composition | Chemical compositions supported by MT                 | Yes             |
| composites           | Composites supported by MT                            | Yes             |
| dimensions           | Number of small dimensions supported by MT            | Yes             |
| shape                | Particle shapes supported by MT                       | Yes             |
| analysis_temperature | Analysis temperature range (celsius) of MT            | Yes             |
| electron_beam        | Use of electron beam by MT                            | Yes             |
| polydispersity       | Grades of polydispersity supported by MT              | Yes             |
| multimodality        | Grades of multimodality supported by MT               | Yes             |
| conductivity         | Conductive properties supported by MT                 | Yes             |
| magnetism            | Magnetic properties supported by MT                   | Yes             |
| functionalisation    | Functionalization supported by MT                     | Yes             |
| light_absorption     | Light absorption supported by MT                      | Yes             |
| fluorescence         | Fluorescence supported by MT                          | Yes             |
| aggregation          | Aggregation supported by MT                           | Yes             |
| agglomeration        | Agglomeration supported by MT                         | Yes             |
| release_iam          | Release of ions, atoms, and molecules supported by MT | Yes             |

<sup>a</sup> Not matched for MT recommendation, but takes effect on parts of the categorization workflow.

**Table S3.** Matchable performance criteria-related attributes for measurement technique description.

| Attribute name                       | Attribute description                                                                                                                        | Matched         |
|--------------------------------------|----------------------------------------------------------------------------------------------------------------------------------------------|-----------------|
| tier                                 | Screening (tier 1) or confirmatory (tier 2) MT                                                                                               | No <sup>a</sup> |
| purpose                              | MT usable for specific purpose(s)/regulations                                                                                                | No <sup>a</sup> |
| disclaimer                           | MT disclaimer and important information for use                                                                                              | No <sup>a</sup> |
| multiconstituent                     | MT supports multi-type samples                                                                                                               | No <sup>a</sup> |
| specific_technique                   | MT provides specific techniques                                                                                                              | No              |
| wr_size_range                        | Particle size range (nm) measured properly by MT                                                                                             | Yes             |
| wr_concentration_range_type          | Concentration range type specified by attribute<br>wr_concentration_range                                                                    | No              |
| wr_concentration_range               | Interpretation is dependent on attribute<br>wr_concentration_range_type                                                                      | No              |
| wr_minimum_sample_type               | Sample type specified by attribute wr_minimum_sample_type                                                                                    | No              |
| wr_minimum_sample                    | Interpretation is dependent on attribute<br>wr_minimum_sample_type                                                                           | No              |
| wr_linear_proportional_size          | MT's results linear/proportional with respect to particle size                                                                               | No              |
| wr_linear_proportional_concentration | MT's results linear/proportional with respect to particle<br>concentration                                                                   | No              |
| wr_detection_quantification_limit    | Size range limits (nm-scaled) of particles MT measures properly                                                                              | No              |
| wr_sensitivity                       | Trust/usability/quality level regarding MT sensitivity                                                                                       | No              |
| trueness                             | Trust/use/quality level regarding MT trueness                                                                                                | No              |
| weighting_trueness                   | Trust/use/quality level regarding MT trueness in weighting<br>size fractions                                                                 | No              |
| robustness                           | Trust/use/quality level regarding MT robustness                                                                                              | No              |
| precision_type                       | Precision range type specified by attribute precision                                                                                        | No              |
| precision                            | MT precision (nm-scaled)                                                                                                                     | No              |
| resolution_type                      | Resolution range type specified by attribute resolution                                                                                      | No              |
| resolution                           | MT resolution (nm-scaled)                                                                                                                    | No              |
| size_distribution                    | MT supports measurement of size distribution                                                                                                 | No              |
| presence                             | MT supports presence of different sized subnano ( $d < 1$ nm in<br>all dimensions) or susnano ( $d > 100$ nm in all dimensions)<br>particles | Yes             |
| sl_discr_nnp_same                    | MT supports the discrimination from non-nanoparticles of the<br>same composition                                                             | No              |
| sl_discr_nnp_same_robustness         | MT provides robustness against different types of impurities in<br>case of discrimination from non-nanoparticles of the same<br>composition  | No              |
| sl_discr_nnp_diff                    | MT supports discrimination from non-nanoparticles of another<br>composition                                                                  | No              |
| sl_discr_nnp_diff_robustness         | MT provides robustness against different types of impurities in<br>case of discrimination from non-nanoparticles of another<br>composition   | No              |
| sl_discr_np_diff                     | MT supports discrimination from nanoparticles of another<br>composition                                                                      | No              |
| sl_discr_np_diff_robustness          | MT provides robustness against different types of impurities in<br>case of discrimination from nanoparticles of another<br>composition       | No              |
| measurement_aggr                     | MT supports particle measurement within aggregates                                                                                           | No              |
| measurement_aggl                     | MT supports particle measurement within agglomerates                                                                                         | No              |
| measurement_individual_particle      | MT supports single particle measurement in size and number                                                                                   | No              |
| constituent_particle_counting_aggr   | MT supports particle measurement in aggregates                                                                                               | No              |
| constituent_particle_counting_aggl   | MT supports particle measurement in agglomerates                                                                                             | No              |
| composition                          | MT provides information on the chemical composition                                                                                          | No              |
| size_type                            | MT measurands (equivalent diameters, nm-scaled)                                                                                              | No              |
| data_format                          | Analysis file data formats provided by the MT                                                                                                | No <sup>a</sup> |
| destructive                          | Sample destruction caused by the MT                                                                                                          | No              |
| os_vacuum                            | Demand of vacuum by the MT                                                                                                                   | Yes             |
| os_sample_support                    | MT demands preparation of suited supports                                                                                                    | No              |

<sup>a</sup> Not matched for MT recommendation, but takes effect on parts of the categorization workflow.

**Table S4.** Matchable technical and economic attributes for measurement technique description.

| Attribute                    | Description                                                               | Matched |
|------------------------------|---------------------------------------------------------------------------|---------|
| direct_counting              | MT support of yielding directly number-weighted size distribution         | No      |
| convertibility               | MT conversion algorithm's quality                                         | No      |
| full_size_range              | MT support of accessing the full size range according to EC NM definition | No      |
| upper_size                   | MT approximate upper size limit                                           | No      |
| lower_size                   | MT approximate lower size limit (close to 1 nm)                           | No      |
| smallest_particle_dimension  | MT support of accessing smallest particle dimension                       | No      |
| primary_particle_access_aggr | MT support of accessing primary particles within aggregates               | No      |
| primary_particle_access_aggl | MT support of accessing primary particles within agglomerates             | No      |
| availability                 | MT availability and wide use                                              | No      |
| standard                     | MT is a standard                                                          | No      |
| reference                    | MT potential as reference method                                          | No      |
| eot_preparation              | MT sample preparation time                                                | No      |
| eot_measurement              | MT measurement time                                                       | No      |
| eot_reduction                | MT data reduction time                                                    | No      |
| eot_total                    | MT total time until results                                               | No      |
| cost_instrument              | MT instrument costs                                                       | No      |
| cost_analysis                | MT analysis costs                                                         | No      |
| cost_efficiency              | MT cost efficiency                                                        | No      |
| expertise                    | MT required expertise                                                     | No      |
| hyphenation                  | MT ability to be hyphenated to other methods.                             | No      |
| vacuum                       | MT demand for vacuum intensity                                            | No      |
| sample_support               | MT demand for preparation on suited supports                              | No      |
| degradation                  | MT risk of chemical sample degradation during measurement                 | No      |
